# Supplementary material
Source: ML conference proceedings conference paper supplement (https://proceedings.neurips.cc/paper_files/paper/2024/hash/f0430903a14db90e5ce96f101902d6d7-Abstract.html)
Supplement: Supplementary file 1 [file f0430903a14db90e5ce96f101902d6d7-Supplemental-Datasets_and_Benchmarks_Track.pdf]

---

# Supplementary Materials:

## BTS: Building Timeseries Dataset: Empowering Large-Scale Building Analytics

---

## 1 Appendices

### 2 E Extra information for NeurIPS submission

3 Note that we are planning to use this dataset for a competition, so we are only releasing a small  
4 snippet at this moment. Information about the competition is not available yet, because it is still in  
5 the planning stage. We will release the full dataset after the competition is completed.

- 6 • Dataset documentation and intended uses. Data card is available on the GitHub: [https://github.com/cruiseresearchgroup/DIEF\\_BTS/blob/main/BTS\\_DataCards.md](https://github.com/cruiseresearchgroup/DIEF_BTS/blob/main/BTS_DataCards.md)
- 7
- 8 • URL to website/platform where the dataset and benchmark can be viewed and downloaded:  
9 [https://github.com/cruiseresearchgroup/DIEF\\_BTS](https://github.com/cruiseresearchgroup/DIEF_BTS)
- 10 • URL to Croissant metadata will not be made available, as typical with spatiotemporal time-  
11 series dataset. See previous accepted dataset: <https://github.com/liuxu77/LargeST>.
- 12 • The author hereby state that we bear all responsibility in case of violation of rights.
- 13 • The data license is CC BY 4.0 and the code license is the MIT License.
- 14 • The data is hosted on FigShare [https://figshare.com/articles/dataset/  
15 BTS\\_Building\\_Timeseries\\_Dataset\\_Empowering\\_Large-Scale\\_Building\\_](https://figshare.com/articles/dataset/BTS_Building_Timeseries_Dataset_Empowering_Large-Scale_Building_Analytics_TRAIN_ONLY_/25912180)  
16 [Analytics\\_TRAIN\\_ONLY\\_/25912180](https://figshare.com/articles/dataset/BTS_Building_Timeseries_Dataset_Empowering_Large-Scale_Building_Analytics_TRAIN_ONLY_/25912180) while the code are hosted on GitHub  
17 [https://github.com/cruiseresearchgroup/DIEF\\_BTS](https://github.com/cruiseresearchgroup/DIEF_BTS), both are reliable, pop-  
18 ular, and reputable platforms for hosting datasets and code.
- 19 • The download link to the data and the metadata is posted on [https://github.com/  
20 cruiseresearchgroup/DIEF\\_BTS](https://github.com/cruiseresearchgroup/DIEF_BTS) once it is made available.
- 21 • Data format: Some file are compressed using ZIP. The timeseries dataset are saved as  
22 pickle .pkl files (<https://docs.python.org/3/library/pickle.html>). The build-  
23 ing metadatas follow the Brick schema (<https://brickschema.org/>), and saved as turtle  
24 .ttl files (<https://www.w3.org/TR/turtle/>).
- 25 • Long-term preservation is ensured by uploading it to the <https://figshare.com/> data  
26 repository.
- 27 • Structured metadata is automatically generated by and available at the FigShare page: [https://figshare.com/articles/dataset/BTS\\_Building\\_Timeseries\\_Dataset\\_  
28 Empowering\\_Large-Scale\\_Building\\_Analytics\\_TRAIN\\_ONLY\\_/25912180](https://figshare.com/articles/dataset/BTS_Building_Timeseries_Dataset_Empowering_Large-Scale_Building_Analytics_TRAIN_ONLY_/25912180).
- 29
- 30 • DOI to the dataset :10.6084/m9.figshare.25912180.
